# Supplementary material for: Tunable Protein Stabilization In Vivo Mediated by Shield-1 in Transgenic Medaka
Source: PubMed Central journal article supplement (PMC4493054; doi:10.1371/journal.pone.0131252), 2015-07-06
Supplement: pone.0131252.s003.pdf [file pone.0131252.s003.pdf]

**S3 Table: Integration sites of the transgene and primers for genotyping.**

The sub-lines of Ola-Tg(actin-DD-YFP) were named by the chromosome carrying the integration, e.g. Ola-Tg(actin-DD-YFP)13. The chromosome cannot be identified in the case of repetitive sequences (Repeat 4).

| <b>Integration site<br/>(Chromosome: Mb)</b> | <b>Forward (FOR)</b>  | <b>Reverse (REV)</b>  | <b>Combination<br/>for transgene</b> |
|----------------------------------------------|-----------------------|-----------------------|--------------------------------------|
| <b>8: 10,044.60</b>                          | TCTGATGCCAGCATGCTGTC  | CATAATCAAGCCTGGCAGTG  | REV, DS5-1                           |
| <b>13: 24,192.94</b>                         | TGTACTCACTGTAGATGTGG  | TTGCGAGTCAGCTTACTGC   | REV, DS3-1                           |
| <b>14: 10,746.85</b>                         | GCTTCAACATCTGTCCCTGG  | CTTCAGTCCTGCATAGGTTGA | FOR, DS3-1                           |
| <b>15: 11,274.07</b>                         | TACCACTGAGCGAGCTGTT   | TCATAATGAAGACCACTAGG  | REV, DS5-1                           |
| <b>19: 16,131.20</b>                         | GAGAGATGCAATTCACAAGC  | CGATCTTCGCGAGCTATGCT  | FOR, DS3-1                           |
| <b>21: 17,218.32</b>                         | TTGCTCACTGGCTAGGATTG  | ACTGAGTCCTCCGGTCCAAA  | FOR, DS3-1                           |
| <b>Repeat 4</b>                              | GAAATGGCTGAACTGTACTGG | n.a.                  | FOR, DS3-1                           |
