# Supplementary material for: Tunable Protein Stabilization In Vivo Mediated by Shield-1 in Transgenic Medaka
Source: PubMed Central journal article supplement (PMC4493054; doi:10.1371/journal.pone.0131252), 2015-07-06
Supplement: pone.0131252.s004.pdf [file pone.0131252.s004.pdf]

**S4 Table: Genotypes of individual fish analyzed in this work.**

Individuals #1-19 were of the F2 generation, #20-23 of the F3 generation. Only individual #21 had a single integration (C13) and was used for further breeding and analysis of embryos. (\*) marks the female individuals used for induction in Figure S7.

| <b>Individual</b> | <b>C8</b> | <b>C13</b> | <b>C14</b> | <b>C15</b> | <b>C19</b> | <b>C21</b> | <b>Repeat 4</b> |
|-------------------|-----------|------------|------------|------------|------------|------------|-----------------|
| <b>#1</b>         | -         | -          | -          | +          | +          | +          | +               |
| <b>#2</b>         | -         | -          | -          | -          | +          | +          | -               |
| <b>#3</b>         | +         | -          | +          | +          | +          | +          | -               |
| <b>#4</b>         | -         | -          | -          | -          | -          | +          | +               |
| <b>#5</b>         | -         | +          | +          | -          | -          | +          | -               |
| <b>#6</b>         | +         | -          | -          | -          | +          | +          | -               |
| <b>#7</b>         | +         | +          | +          | +          | +          | +          | +               |
| <b>#8</b>         | +         | -          | -          | -          | +          | -          | +               |
| <b>#9</b>         | +         | +          | -          | +          | +          | -          | -               |
| <b>#10</b>        | -         | -          | -          | +          | +          | -          | -               |
| <b>#11</b>        | -         | -          | -          | +          | +          | -          | +               |
| <b>#12</b>        | +         | -          | -          | +          | -          | +          | -               |
| <b>#13</b>        | +         | -          | -          | +          | -          | +          | -               |
| <b>#14 *</b>      | -         | -          | -          | +          | +          | -          | -               |
| <b>#15</b>        | +         | +          | +          | +          | -          | +          | +               |
| <b>#16</b>        | -         | -          | -          | +          | +          | -          | +               |
| <b>#17 *</b>      | -         | -          | -          | +          | +          | -          | -               |
| <b>#18 *</b>      | -         | -          | -          | +          | +          | -          | -               |
| <b>#19</b>        | -         | +          | -          | +          | -          | +          | -               |
| <b>#20</b>        | -         | +          | -          | -          | -          | +          | -               |
| <b>#21</b>        | -         | +          | -          | -          | -          | -          | -               |
| <b>#22</b>        | -         | -          | -          | -          | +          | +          | -               |
| <b>#23</b>        | -         | -          | -          | +          | -          | +          | -               |
